# Supplementary material for: Cytogeography of Naturalized Solidago canadensis Populations in Europe
Source: MDPI journal article supplement (doi:10.3390/plants12051113), 2023-03-01
Supplement: s1 [file s1]

**Table S1.** Population used for morphological traits

| Population No.   | Latitude | Longitude | Phenotype<br>identification | Molecular<br>Identification | Ploidy |
|------------------|----------|-----------|-----------------------------|-----------------------------|--------|
| Introduced range |          |           |                             |                             |        |
| CN01             | 31.13    | 121.19    | <i>S. canadensis</i>        | <i>S. canadensis</i>        | 6x     |
| CN02             | 31.15    | 121.38    | <i>S. canadensis</i>        | <i>S. canadensis</i>        | 4x/6x  |
| CN04             | 32.03    | 118.49    | <i>S. canadensis</i>        | <i>S. canadensis</i>        | 4x     |
| CN05             | 32.11    | 118.83    | <i>S. canadensis</i>        | <i>S. canadensis</i>        | 4x     |
| CN06             | 32.09    | 118.89    | <i>S. canadensis</i>        | <i>S. canadensis</i>        | 6x     |
| CN07             | 32.30    | 119.53    | <i>S. canadensis</i>        | <i>S. canadensis</i>        | 6x     |
| CN09             | 31.49    | 120.45    | <i>S. canadensis</i>        | <i>S. canadensis</i>        | 6x     |
| CN10             | 32.02    | 120.58    | <i>S. canadensis</i>        | <i>S. canadensis</i>        | 6x     |
| CN11             | 31.93    | 121.13    | <i>S. canadensis</i>        | <i>S. canadensis</i>        | 4x     |
| CN12             | 31.53    | 120.15    | <i>S. canadensis</i>        | <i>S. canadensis</i>        | 6x     |
| CN13             | 31.50    | 120.07    | <i>S. canadensis</i>        | <i>S. canadensis</i>        | 4x     |
| CN14             | 31.02    | 120.38    | <i>S. canadensis</i>        | <i>S. canadensis</i>        | 6x     |
| CN15             | 31.22    | 121.04    | <i>S. canadensis</i>        | <i>S. canadensis</i>        | 4x     |
| CN16             | 31.49    | 120.42    | <i>S. canadensis</i>        | <i>S. canadensis</i>        | 6x     |
| CN17             | 34.44    | 119.24    | <i>S. canadensis</i>        | <i>S. canadensis</i>        | 4x/6x  |
| CN18             | 31.93    | 120.02    | <i>S. canadensis</i>        | <i>S. canadensis</i>        | 6x     |
| CN20             | 32.09    | 119.24    | <i>S. canadensis</i>        | <i>S. canadensis</i>        | 6x     |
| CN21             | 32.13    | 119.33    | <i>S. canadensis</i>        | <i>S. canadensis</i>        | 6x     |
| CN22             | 33.97    | 118.31    | <i>S. canadensis</i>        | <i>S. canadensis</i>        | 6x     |
| CN23             | 33.33    | 120.15    | <i>S. canadensis</i>        | <i>S. canadensis</i>        | 6x     |
| CN24             | 34.31    | 117.21    | <i>S. canadensis</i>        | <i>S. canadensis</i>        | 6x     |
| CN25             | 31.83    | 120.27    | <i>S. canadensis</i>        | <i>S. canadensis</i>        | 6x     |
| CN26             | 33.18    | 120.35    | <i>S. canadensis</i>        | <i>S. canadensis</i>        | 4x     |
| CN27             | 27.47    | 120.37    | <i>S. canadensis</i>        | <i>S. canadensis</i>        | 6x     |
| CN28             | 29.06    | 119.39    | <i>S. canadensis</i>        | <i>S. canadensis</i>        | 6x     |
| CN29             | 30.45    | 120.44    | <i>S. canadensis</i>        | <i>S. canadensis</i>        | 4x     |
| CN30             | 29.05    | 121.37    | <i>S. canadensis</i>        | <i>S. canadensis</i>        | 4x     |
| CN31             | 30.18    | 120.19    | <i>S. canadensis</i>        | <i>S. canadensis</i>        | 6x     |
| CN32             | 30.16    | 120.13    | <i>S. canadensis</i>        | <i>S. canadensis</i>        | 4x/6x  |
| CN33             | 28.62    | 119.30    | <i>S. canadensis</i>        | <i>S. canadensis</i>        | 6x     |
| CN34             | 28.57    | 121.31    | <i>S. canadensis</i>        | <i>S. canadensis</i>        | 6x     |
| CN35             | 28.95    | 118.87    | <i>S. canadensis</i>        | <i>S. canadensis</i>        | 6x     |
| CN36             | 29.99    | 120.54    | <i>S. canadensis</i>        | <i>S. canadensis</i>        | 6x     |
| CN38             | 30.88    | 120.17    | <i>S. canadensis</i>        | <i>S. canadensis</i>        | 6x     |
| CN39             | 30.56    | 117.48    | <i>S. canadensis</i>        | <i>S. canadensis</i>        | 6x     |
| CN40             | 29.52    | 121.37    | <i>S. canadensis</i>        | <i>S. canadensis</i>        | 6x     |
| CN41             | 32.55    | 117.22    | <i>S. canadensis</i>        | <i>S. canadensis</i>        | 6x     |
| CN42             | 31.47    | 117.18    | <i>S. canadensis</i>        | <i>S. canadensis</i>        | 6x     |
| CN43             | 32.40    | 117.04    | <i>S. canadensis</i>        | <i>S. canadensis</i>        | 6x     |

|                                         |          |           |                      |                      |       |
|-----------------------------------------|----------|-----------|----------------------|----------------------|-------|
| CN44                                    | 31.22    | 118.22    | <i>S. canadensis</i> | <i>S. canadensis</i> | 4x    |
| CN45                                    | 30.25    | 116.39    | <i>S. canadensis</i> | <i>S. canadensis</i> | 6x    |
| CN46                                    | 30.70    | 118.91    | <i>S. canadensis</i> | <i>S. canadensis</i> | 6x    |
| CN47                                    | 31.59    | 116.52    | <i>S. canadensis</i> | <i>S. canadensis</i> | 6x    |
| CN48                                    | 29.74    | 116.04    | <i>S. canadensis</i> | <i>S. canadensis</i> | 6x    |
| CN49                                    | 28.73    | 115.88    | <i>S. canadensis</i> | <i>S. canadensis</i> | 6x    |
| CN50                                    | 29.35    | 117.19    | <i>S. canadensis</i> | <i>S. canadensis</i> | 4x    |
| CN53                                    | 29.35    | 113.09    | <i>S. canadensis</i> | <i>S. canadensis</i> | 6x    |
| CN54                                    | 27.85    | 113.10    | <i>S. canadensis</i> | <i>S. canadensis</i> | 6x    |
| CN55                                    | 27.10    | 112.88    | <i>S. canadensis</i> | <i>S. canadensis</i> | 6x    |
| CN56                                    | 28.26    | 113.05    | <i>S. canadensis</i> | <i>S. canadensis</i> | 6x    |
| CN58                                    | 30.74    | 111.25    | <i>S. canadensis</i> | <i>S. canadensis</i> | 6x    |
| CN59                                    | 31.62    | 111.17    | <i>S. canadensis</i> | <i>S. canadensis</i> | 6x    |
| CN60                                    | 34.79    | 113.56    | <i>S. canadensis</i> | <i>S. canadensis</i> | 6x    |
| CN61                                    | 27.73    | 118.01    | <i>S. canadensis</i> | <i>S. canadensis</i> | 6x    |
| CN62                                    | 25.62    | 110.65    | <i>S. canadensis</i> | <i>S. canadensis</i> | 4x/6x |
| CN64                                    | 31.47    | 120.25    | <i>S. canadensis</i> | <i>S. canadensis</i> | 4x    |
| CN65                                    | 32.11    | 118.88    | <i>S. canadensis</i> | <i>S. canadensis</i> | 4x    |
| CN69                                    | 31.97    | 120.64    | <i>S. canadensis</i> | <i>S. canadensis</i> | 6x    |
| RUS01                                   | 43.12    | 131.89    | <i>S. canadensis</i> | <i>S. canadensis</i> | 2x    |
| EU01                                    | 6.76     | 51.43     | <i>S. canadensis</i> | <i>S. canadensis</i> | 2x    |
| EU02                                    | 7.46     | 51.37     | <i>S. canadensis</i> | <i>S. canadensis</i> | 2x    |
| EU03                                    | 7.46     | 51.37     | <i>S. canadensis</i> | <i>S. canadensis</i> | 2x    |
| EU09                                    | 2.12     | 48.81     | <i>S. canadensis</i> | <i>S. canadensis</i> | 6x    |
| EU10                                    | 13.37    | 52.51     | <i>S. canadensis</i> | <i>S. canadensis</i> | 6x    |
| EU11                                    | 12.49    | 41.89     | <i>S. canadensis</i> | <i>S. canadensis</i> | 6x    |
| EU12                                    | 11.27    | 43.78     | <i>S. canadensis</i> | <i>S. canadensis</i> | 6x    |
| EU13                                    | 16.38    | 48.19     | <i>S. canadensis</i> | <i>S. canadensis</i> | 6x    |
| EU14                                    | 7.53     | 47.02     | <i>S. canadensis</i> | <i>S. canadensis</i> | 2x    |
| EU15                                    | 7.75     | 47.22     | <i>S. canadensis</i> | <i>S. canadensis</i> | 2x    |
| JP01                                    | 36.23.59 | 140.40.29 | <i>S. altissima</i>  | <i>S. canadensis</i> | 6x    |
| JP02                                    | 36.27.59 | 140.39.29 | <i>S. altissima</i>  | <i>S. canadensis</i> | 6x    |
| JP03                                    | 36.37.08 | 140.20.07 | <i>S. altissima</i>  | <i>S. canadensis</i> | 6x    |
| JP04                                    | 36.34.92 | 140.20.52 | <i>S. altissima</i>  | <i>S. canadensis</i> | 6x    |
| JP05                                    | 36.33.49 | 140.51.80 | <i>S. altissima</i>  | <i>S. canadensis</i> | 6x    |
| Cultivated <i>S.canadensis</i> in China |          |           |                      |                      |       |
| LYG                                     | 34.60    | 119.18    | <i>S. canadensis</i> | <i>S. canadensis</i> | 2x    |
| NJ                                      | 32.08    | 118.79    | <i>S. canadensis</i> | <i>S. canadensis</i> | 2x    |
| YN                                      | 25.07    | 102.76    | <i>S. canadensis</i> | <i>S. canadensis</i> | 2x    |
| Native range                            |          |           |                      |                      |       |
| CA09                                    | 45.50    | -75.80    | <i>S. canadensis</i> | <i>S. canadensis</i> | 2x    |
| CA13                                    | 46.31    | -72.65    | <i>S. canadensis</i> | <i>S. canadensis</i> | 2x    |
| CA14                                    | 46.76    | -71.29    | <i>S. canadensis</i> | <i>S. canadensis</i> | 2x    |
| US02                                    | 34.25    | -79.70    | <i>S. canadensis</i> | <i>S. canadensis</i> | 4x/6x |

|                         |       |        |                      |                      |       |
|-------------------------|-------|--------|----------------------|----------------------|-------|
| US03                    | 34.23 | -77.83 | <i>S. canadensis</i> | <i>S. canadensis</i> | 4x/6x |
| US04                    | 37.80 | -81.22 | <i>S. canadensis</i> | <i>S. canadensis</i> | 6x    |
| US06                    | 38.35 | -81.65 | <i>S. canadensis</i> | <i>S. canadensis</i> | 4x/6x |
| US07                    | 37.15 | -79.23 | <i>S. canadensis</i> | <i>S. canadensis</i> | 4x/6x |
| US08                    | 36.97 | -81.07 | <i>S. canadensis</i> | <i>S. canadensis</i> | 4x    |
| US09                    | 36.18 | -84.07 | <i>S. canadensis</i> | <i>S. canadensis</i> | 4x    |
| US10                    | 35.05 | -84.90 | <i>S. canadensis</i> | <i>S. canadensis</i> | 6x    |
| US12                    | 40.24 | -76.80 | <i>S. canadensis</i> | <i>S. canadensis</i> | 4x/6x |
| US13                    | 41.08 | -75.96 | <i>S. canadensis</i> | <i>S. canadensis</i> | 6x    |
| US14                    | 41.38 | -75.03 | <i>S. canadensis</i> | <i>S. canadensis</i> | 4x/6x |
| US23                    | 41.42 | -73.34 | <i>S. canadensis</i> | <i>S. canadensis</i> | 6x    |
| US25                    | 41.49 | -71.54 | <i>S. canadensis</i> | <i>S. canadensis</i> | 6x    |
| US27                    | 42.45 | -71.24 | <i>S. canadensis</i> | <i>S. canadensis</i> | 4x/6x |
| US28                    | 43.03 | -73.79 | <i>S. canadensis</i> | <i>S. canadensis</i> | 4x/6x |
| US29                    | 43.14 | -77.67 | <i>S. canadensis</i> | <i>S. canadensis</i> | 4x/6x |
| US30                    | 43.09 | -79.00 | <i>S. canadensis</i> | <i>S. canadensis</i> | 4x/6x |
| US31                    | 42.47 | 79.32  | <i>S. canadensis</i> | <i>S. canadensis</i> | 6x    |
| US34                    | 42.92 | 87.94  | <i>S. canadensis</i> | <i>S. canadensis</i> | 4x/6x |
| US35                    | 39.10 | 84.28  | <i>S. canadensis</i> | <i>S. canadensis</i> | 6x    |
| US36                    | 39.89 | 84.17  | <i>S. canadensis</i> | <i>S. canadensis</i> | 6x    |
| US40                    | 39.47 | 82.31  | <i>S. canadensis</i> | <i>S. canadensis</i> | 4x/6x |
| US20                    | 42.05 | -80.08 | <i>S. altissima</i>  | <i>S. canadensis</i> | 6x    |
| US33                    | 43.17 | -85.63 | <i>S. altissima</i>  | <i>S. canadensis</i> | 6x    |
| US52                    | 43.64 | 73.24  | <i>S. canadensis</i> | <i>S. canadensis</i> | 4x/6x |
| US53                    | 43.98 | 72.63  | <i>S. canadensis</i> | <i>S. canadensis</i> | 2x    |
| US54                    | 43.94 | 72.63  | <i>S. canadensis</i> | <i>S. canadensis</i> | 4x/6x |
| US45                    | 40.47 | -86.93 | <i>S. altissima</i>  | <i>S. canadensis</i> | 6x    |
| US58                    | 44.95 | 92.93  | <i>S. canadensis</i> | <i>S. canadensis</i> | 4x    |
| US59                    | 45.54 | 94.27  | <i>S. canadensis</i> | <i>S. canadensis</i> | 4x/6x |
| US60                    | 45.61 | 95.88  | <i>S. canadensis</i> | <i>S. canadensis</i> | 4x    |
| Closely related species |       |        |                      |                      |       |
| US18                    | 41.37 | -75.06 | <i>S. gigantea</i>   | <i>S. gigantea</i>   |       |
| US51                    | 43.35 | -73.68 | <i>S. gigantea</i>   | <i>S. gigantea</i>   |       |
| US57                    | 45.86 | -96.73 | <i>S. gigantea</i>   | <i>S. gigantea</i>   |       |
| SS                      | 45.50 | -75.80 | <i>S. simplex</i>    | <i>S. simplex</i>    |       |
| SD                      | 32.12 | 118.35 | <i>S. decurrens</i>  | <i>S. decurrens</i>  |       |

Note: Blue represents Europe populations; green represents populations identified previously as *S. altissima*.

**Table S2.** List of distinct localities of *S. canadensis* and *S. altissima* with previously published ploidy level determination.

|                                                                                                                                                               | Diploid | Tetraploid | Hexaploid |
|---------------------------------------------------------------------------------------------------------------------------------------------------------------|---------|------------|-----------|
| <b>Native rang (North America)</b>                                                                                                                            | 359*    | 93         | 294       |
| Abhilasha, D. et al. (2008)                                                                                                                                   | 4       | 2          | 0         |
| Beaudry, J. R. & Chabot, D. L. (1959)                                                                                                                         | 12      | 0          | 7         |
| Beaudry, J. R. (1968)                                                                                                                                         | 10      | 0          | 0         |
| Beaudry, J. R. & Chabot, D. L. (1957)                                                                                                                         | 1       | 0          | 0         |
| Beaudry, J. R. (1970)                                                                                                                                         | 3       | 0          | 0         |
| Calder, J. A (1968)                                                                                                                                           | 0       | 1          | 0         |
| Chinnappa, C. C. & Chmielewski, J. G. (1987)                                                                                                                  | 1       | 0          | 0         |
| Halverson, K. et al. (2008)                                                                                                                                   | 159     | 62         | 115       |
| Keil, D. J. & Pinkava, D. J. et al. (1979)                                                                                                                    | 1       | 0          | 0         |
| Kapoor, B. M. (1970)                                                                                                                                          | 1       | 0          | 0         |
| Kapoor, B. M. (1978)                                                                                                                                          | 2       | 0          | 0         |
| Löve, Á. & Löve, D (1982)                                                                                                                                     | 2       | 0          | 0         |
| Melville, M. R. & Mortorn, J. K. (1982)                                                                                                                       | 98      | 0          | 82        |
| Pringle, J. S. (1979)                                                                                                                                         | 1       | 0          | 0         |
| Raven, P. H. et al. (1960)                                                                                                                                    | 0       | 0          | 1         |
| Semple, J. C. et al. (1984)                                                                                                                                   | 2       | 7          | 12        |
| Semple, J. C. et al. (1989)                                                                                                                                   | 16      | 2          | 2         |
| Semple, J. C. & Chmielewski, J. G. (1987)                                                                                                                     | 3       | 7          | 2         |
| Semple, J. C. (1985)                                                                                                                                          | 3       | 2          | 6         |
| Semple, J. C. et al. (1992)                                                                                                                                   | 1       | 3          | 2         |
| Semple, J. C. et al. (1993)                                                                                                                                   | 2       | 2          | 0         |
| Semple, J. C. et al. (2001)                                                                                                                                   | 4       | 5          | 9         |
| Semple, J. C. & Cook (2004)                                                                                                                                   | 5       | 0          | 0         |
| Tomkins D. J. & Grant, W. F. (1978)                                                                                                                           | 8       | 0          | 0         |
| van Kleunen, M. & Schmid, B. (2003)                                                                                                                           | 17      | 0          | 51        |
| Ward, D. E. & Spellenberg, R. W. (1986)                                                                                                                       | 3       | 0          | 3         |
| Ward, D. E. & Spellenberg, R. W. (1988)                                                                                                                       | 0       | 0          | 2         |
| <b>Introduced range</b>                                                                                                                                       | 150     | 0          | 2         |
| Switzerland (Abhilasha, D. et al. 2008; van Kleunen, M. & Schmid, B.,2003)                                                                                    | 26      | 0          | 0         |
| Poland (Malecka J.1988, Malecka J 1978, Musial, K.1989a, Malecka, J.1989b, van Kleunen, M. & Schmid, B. 2003, Morto J. K. et al. 2018, Musiał K. et al. 2020) | 78      | 0          | 0         |
| Russia (Probatova et al. 2008)                                                                                                                                | 1       | 0          | 0         |
| Germany (Cheng et al. 2020a, van Kleunen, M. & Schmid, B. 2003)                                                                                               | 19      | 0          | 0         |

|                                                    |   |   |   |
|----------------------------------------------------|---|---|---|
| Czech Republic (van Kleunen, M. & Schmid, B. 2003) | 8 | 0 | 0 |
| France (van Kleunen, M. & Schmid, B. 2003)         | 8 | 0 | 0 |
| Austria (van Kleunen, M. & Schmid, B. 2003)        | 8 | 0 | 0 |
| Belgium (Verloove F. et al. 2017)                  | 0 | 0 | 1 |
| Holand (Xu H Q 2016)                               | 1 | 0 | 0 |
| UK (Semple J. C 2004)                              | 1 | 0 | 0 |
| India (Sarkar, A. K. et al.1980)                   | 0 | 0 | 1 |

Note: Part of the literature does not explicitly mention the number of diploid plants, so the number was the count to one at the collection sites.

**Table S3.** Test of ITS and *psbA-trnH* intergenic spacer sequences of *Solidago altissima* blasted in NCBI database

| Population codes                             | Accession number from Genebank | Species              | Query cover | Homology comparison to <i>S. canadensis</i> | Variable sites |
|----------------------------------------------|--------------------------------|----------------------|-------------|---------------------------------------------|----------------|
| ITS sequences                                |                                |                      |             |                                             |                |
| JP01-JP04                                    | HQ142590.1                     | <i>S. canadensis</i> | 100%        | 100%                                        |                |
| US20                                         | HQ142590.1                     | <i>S. canadensis</i> | 100%        | 100%                                        |                |
| US33                                         | HQ142590.1                     | <i>S. canadensis</i> | 100%        | 100%                                        |                |
| US45                                         | HQ142590.1                     | <i>S. canadensis</i> | 100%        | 99.84%                                      | 5(C→T)         |
| <i>psbA-trnH</i> intergenic spacer sequences |                                |                      |             |                                             |                |
| JP01-JP04                                    | KX214929.1                     | <i>S. canadensis</i> | 91%         | 100%                                        |                |
| US20                                         | KX214929.1                     | <i>S. canadensis</i> | 91%         | 100%                                        |                |
| US33                                         | KX214929.1                     | <i>S. canadensis</i> | 100%        | 100%                                        |                |
| US45                                         | KX214929.1                     | <i>S. canadensis</i> | 100%        | 100%                                        |                |

**Table S4.** Flow cytometric ploidy analysis of Europe populations

| Population | Ratio of peak positions (Mean± SD) | Number of measurements | Ploidy levels |
|------------|------------------------------------|------------------------|---------------|
| EU01       | 1                                  | 6                      | 2             |
| EU02       | 1                                  | 6                      | 2             |
| EU03       | 1                                  | 6                      | 2             |
| EU09       | 2.604±0.055                        | 6                      | 6             |
| EU10       | 2.623±0.002                        | 6                      | 6             |
| EU11       | 2.628±0.054                        | 6                      | 6             |
| EU12       | 2.712±0.065                        | 6                      | 6             |
| EU13       | 2.671±0.050                        | 6                      | 6             |
| EU14       | 1                                  | 6                      | 2             |
| EU15       | 1                                  | 6                      | 2             |

Note: the native diploid population (CA09) used as the internal reference.

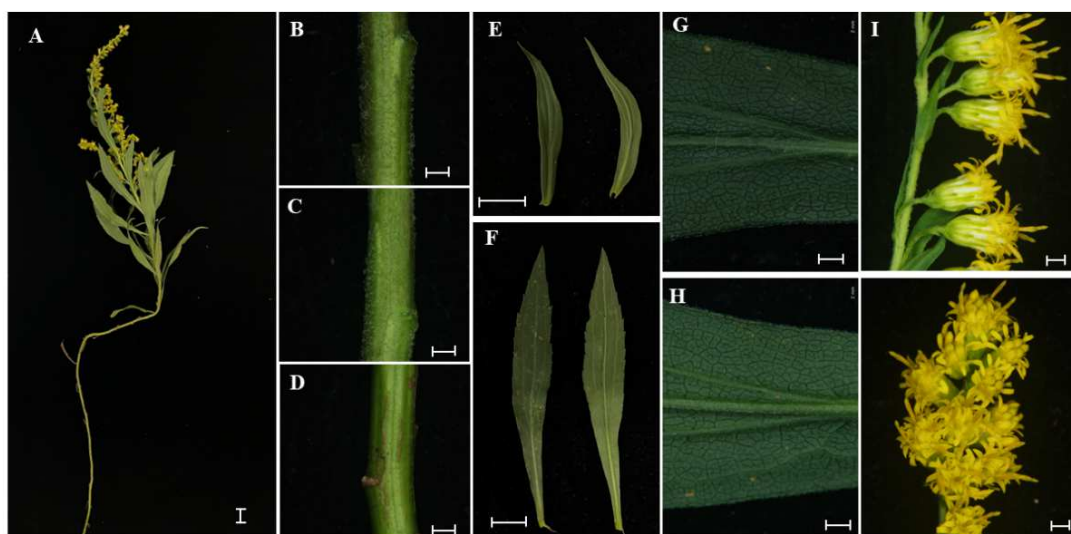

**Figure S1.** Morphology of *S. canadensis* (2x) form Canada. A. Shoot, scale = 1 cm; B-D, upper, middle, lower stem, scale = 2 mm; E-F, upper, lower stem leaves, scale = 1 cm; G-H, upper epidermal veins, lower epidermal veins, scale = 2 mm; I, involucres, scale = 2 mm; J, florets, scale = 2 mm.

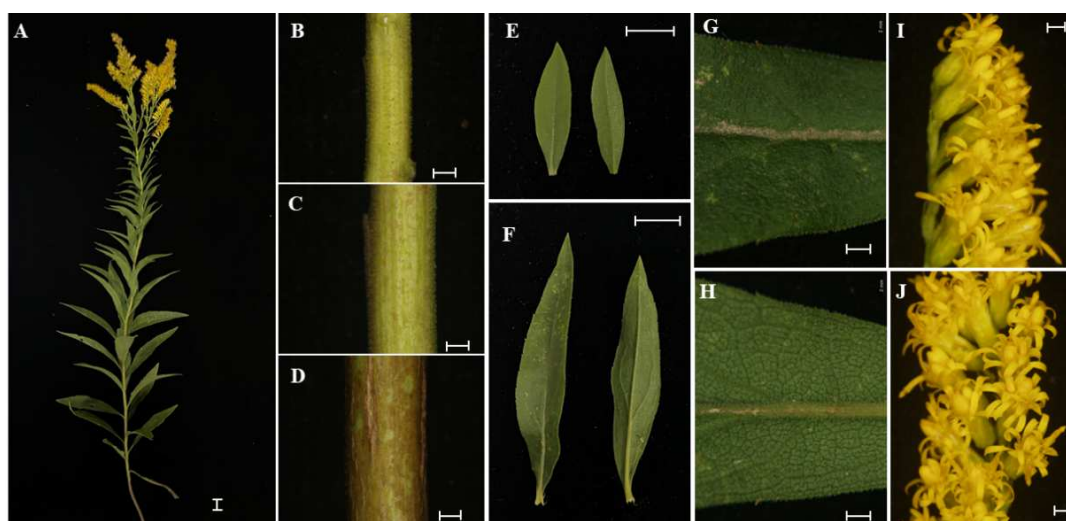

**Figure S2.** Morphology of *S. canadensis* (6x) form USA. A. Shoot, scale = 1 cm; B-D, upper, middle, lower stem, scale = 2 mm; E-F, upper, lower stem leaves, scale = 1 cm; G-H, upper epidermal veins, lower epidermal veins, scale = 2 mm; I, involucres, scale = 2 mm; J, florets, scale = 2 mm.

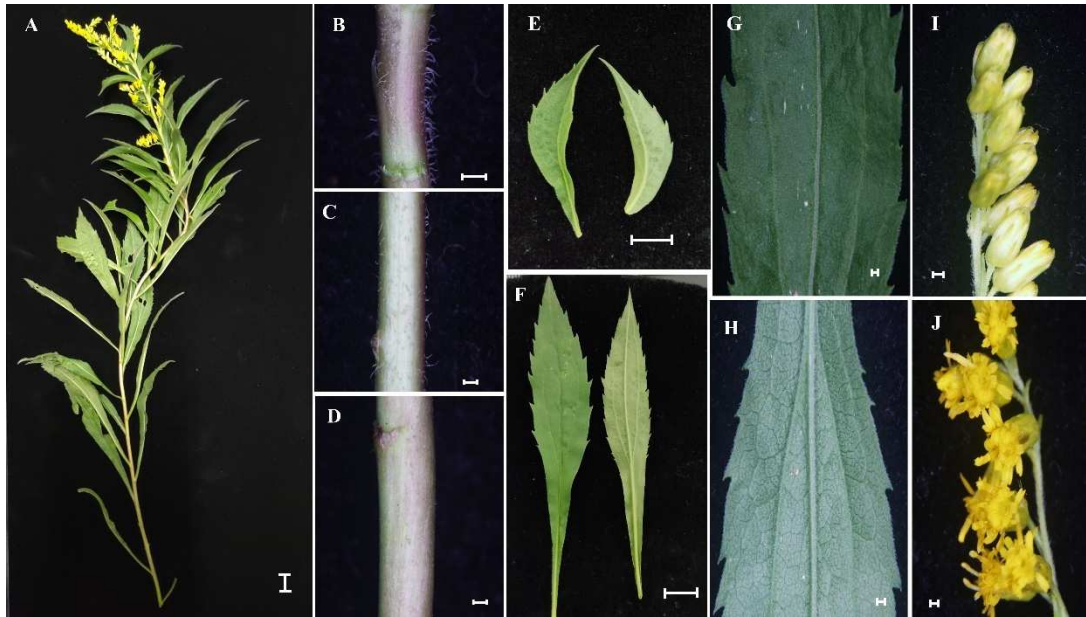

**Figure S3.** Morphology of *S. canadensis* (2x) form Russia. A. Shoot, scale = 1 cm; B-D, upper, middle, lower stem, scale = 2 mm; E-F, upper, lower stem leaves, scale = 1 cm; G-H, upper epidermal veins, lower epidermal veins, scale = 1 mm; I, involucres, scale = 1 mm; J, florets, scale = 1 mm.

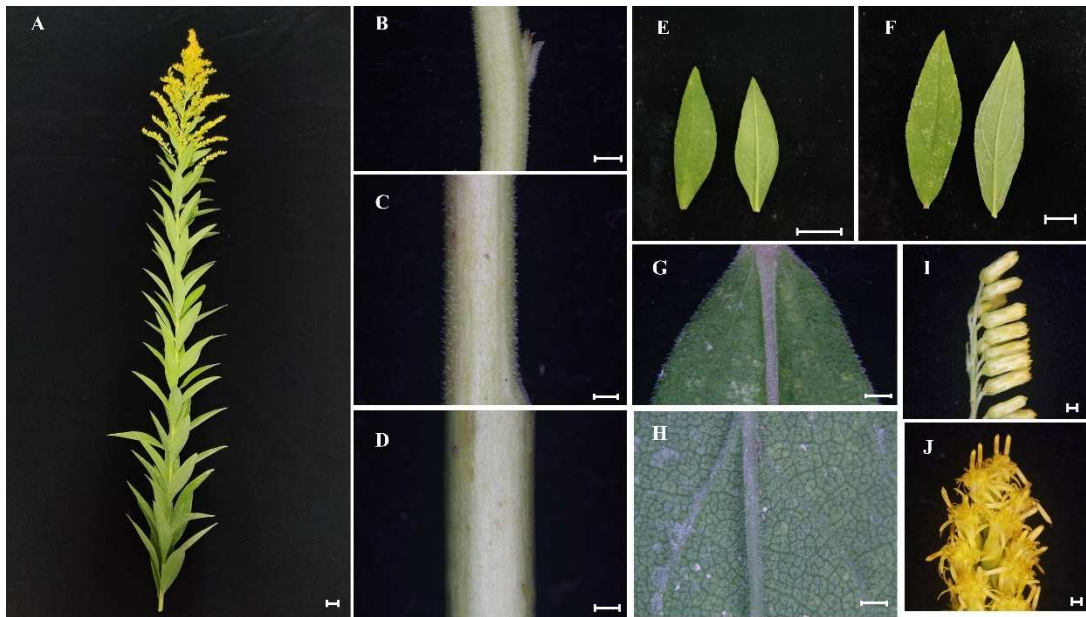

**Figure S4.** Morphology of *S. canadensis* (6x) form China. A. Shoot, scale = 1 cm; B-D, upper, middle, lower stem, scale = 2 mm; E-F, upper, lower stem leaves, scale = 1 cm; G-H, upper epidermal veins, lower epidermal veins, scale = 1 mm; I, involucres, scale = 1 mm; J, florets, scale = 1 mm.

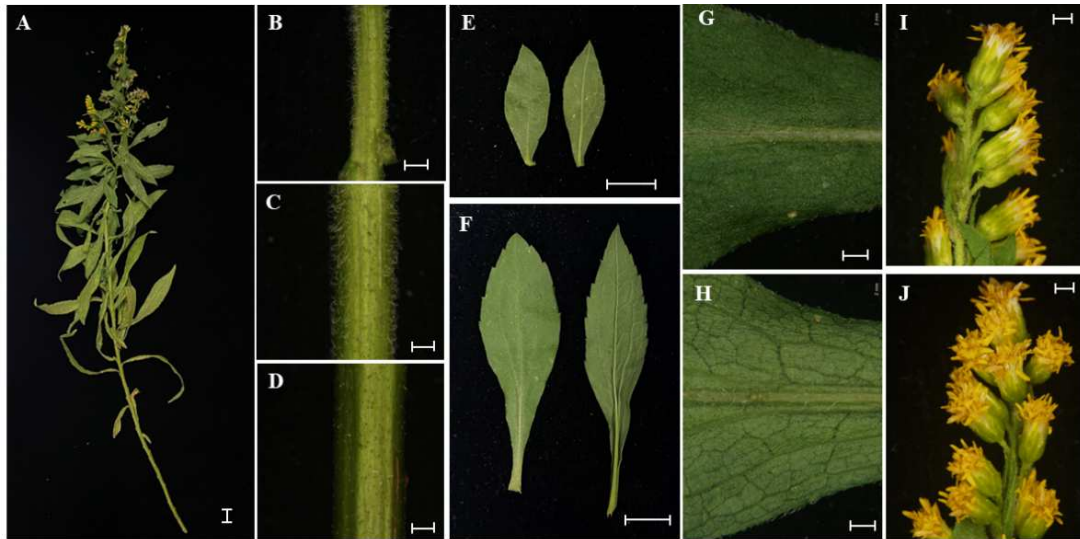

**Figure S5.** Morphology of *S. canadensis* (2x) form Europe. A. Shoot, scale = 1 cm; B-D, upper, middle, lower stem, scale = 2 mm; E-F, upper, lower stem leaves, scale = 1 cm; G-H, upper epidermal veins, lower epidermal veins, scale = 2 mm; I, involucres, scale = 2 mm; J, florets, scale = 2 mm.

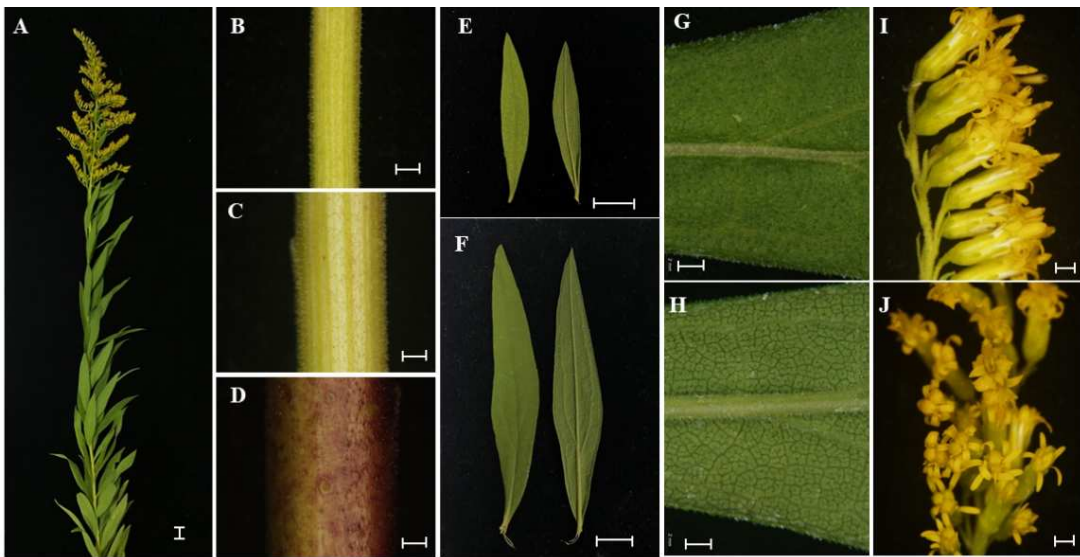

**Figure S6.** Morphology of *S. canadensis* (6x) form Europe. A. Shoot, scale = 1 cm; B-D, upper, middle, lower stem, scale = 2 mm; E-F, upper, lower stem leaves, scale = 1 cm; G-H, upper epidermal veins, lower epidermal veins, scale = 2 mm; I, involucres, scale = 2 mm; J, florets, scale = 2 mm.

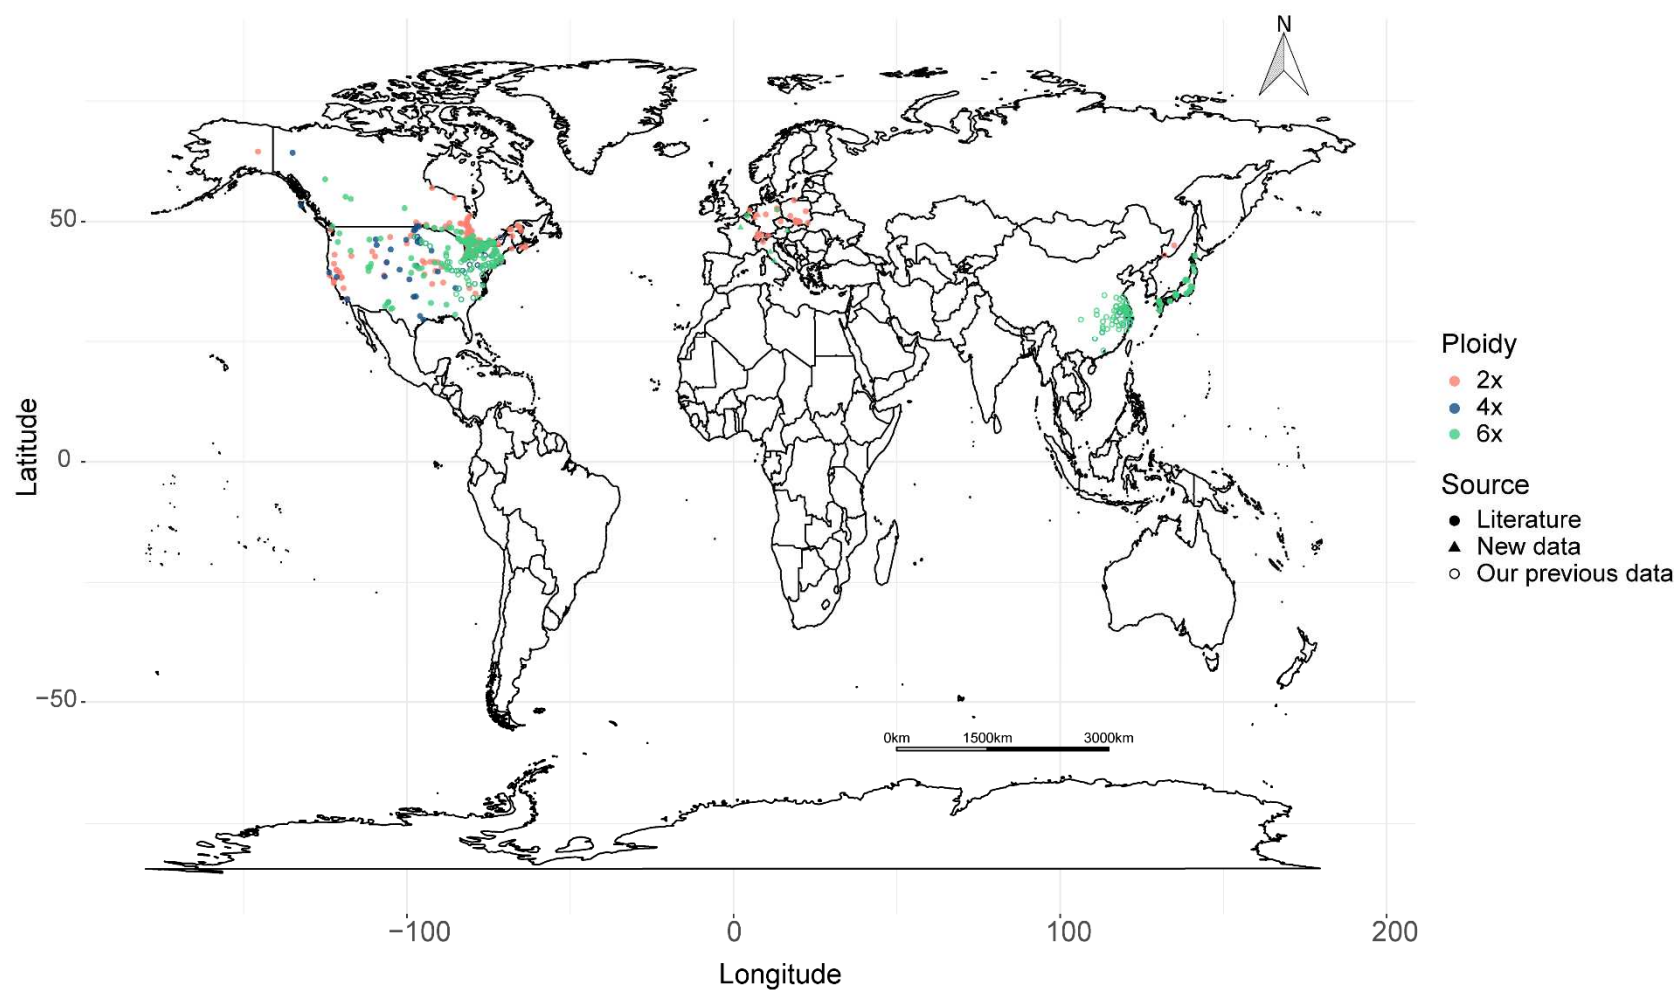

**Figure S7.** Cytogeography of *S. canadensis* at the Northern Hemisphere. The source of population information was shown in Table S2, our previous data was described in Cheng et al. [6].
